# Supplementary material for: p20BAP31 Induces Autophagy in Colorectal Cancer Cells by Promoting PERK-Mediated ER Stress
Source: MDPI journal article supplement (doi:10.3390/ijms25105101), 2024-05-07
Supplement: s1 [file s1]

# p20BAP31 Induces Autophagy in Colorectal Cancer Cells by Promoting PERK-Mediated ER Stress

Xiaohan Jiang, Guoxun Li, Benzhi Zhu, Jiaying Yang, Shuyu Cui, Rui Jiang \*  
and Bing Wang \*

College of Life and Health Science, Northeastern University, 195 Chuangxin Road, Hunnan District, 110819 Shenyang, China; xiaohanjiang2014@163.com (X.J.); liguoxuner@126.com (G.L.); zhubezhi0203@163.com (B.Z.); 2201476@stu.neu.edu.cn (J.Y.); cuishuyu0615@163.com (S.C.)

\* Correspondence: jiangrui@mail.neu.edu.cn (R.J.); wangbing@mail.neu.edu.cn (B.W.)

## Supplementary Information

### Summary

Figure S1–S3 and the corresponding figure legends.

Table S1: Sequences of primers for PCR, qRT-PCR and siRNA.

### Supplementary Figures and Figure legends

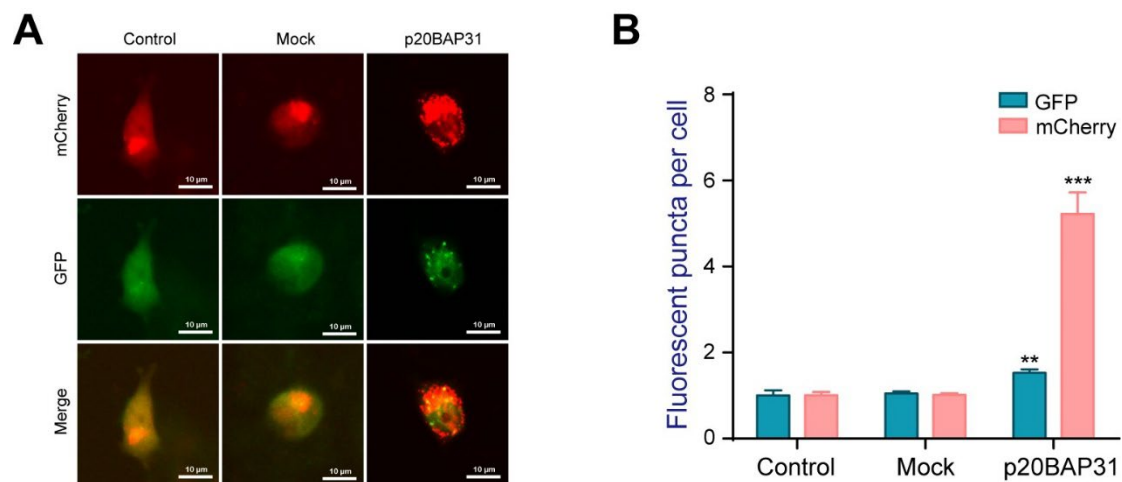

**Figure S1.** Overexpression of p20BAP31 induces autophagy. (A) HCT116 cells were transfected with p20BAP31 and Ad-mCherry-GFP-LC3B for 48 h. Representative images were captured by a fluorescence microscope. (B) Quantification analysis of EGFP and mCherry fluorescent puncta (n = 10 cells). \*\* $P < 0.01$ , \*\*\* $P < 0.001$ .

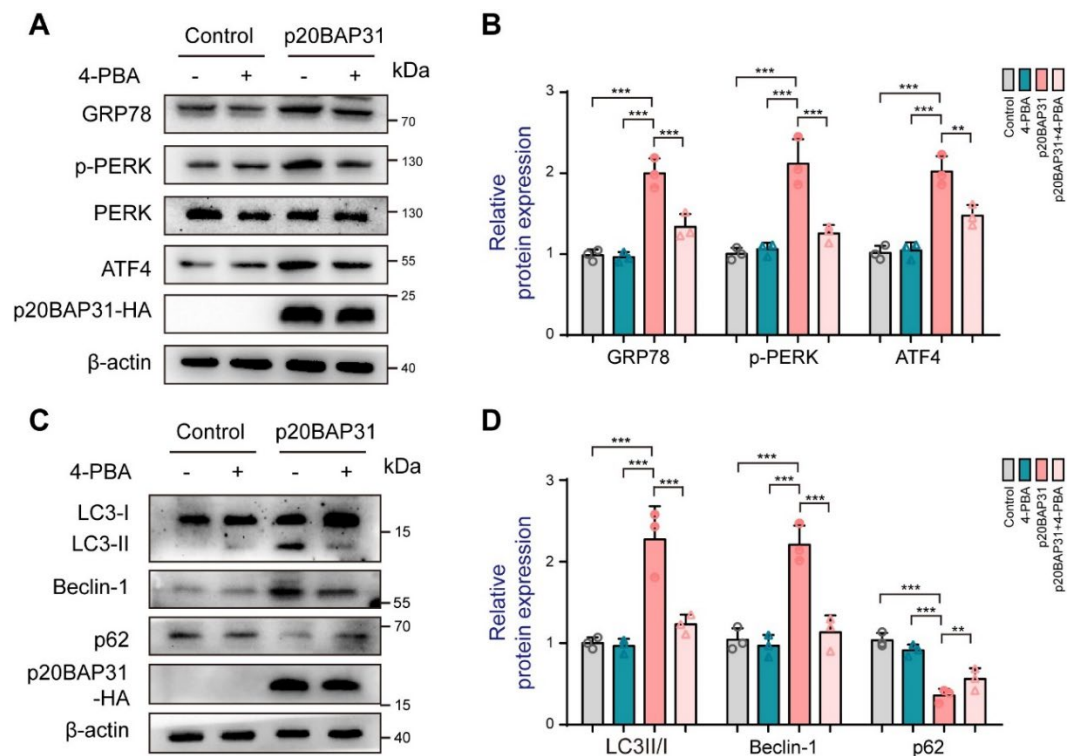

**Figure S2.** Inhibition of ER stress attenuates p20BAP31-induced autophagy. HCT116 cells were transfected with p20BAP31 for 24 h with or without pretreatment with 200  $\mu$ M 4-PBA for 2 h. **(A)** Western blot analysis was used to detect GRP78, p-PERK, PERK, ATF4 and p20BAP31-HA levels. **(B)** Quantification analysis of GRP78, p-PERK and ATF4.  $\beta$ -actin served as the loading control. **(C)** Western blot analysis was used to detect LC3, Beclin-1, p62 and p20BAP31-HA levels. **(D)** Quantification analysis of LC3, Beclin-1 and p62.  $\beta$ -actin served as the loading control. The data are presented as the means  $\pm$  SDs of three independent experiments. \*\* $P$  < 0.01, \*\*\* $P$  < 0.001, ns, not significance.

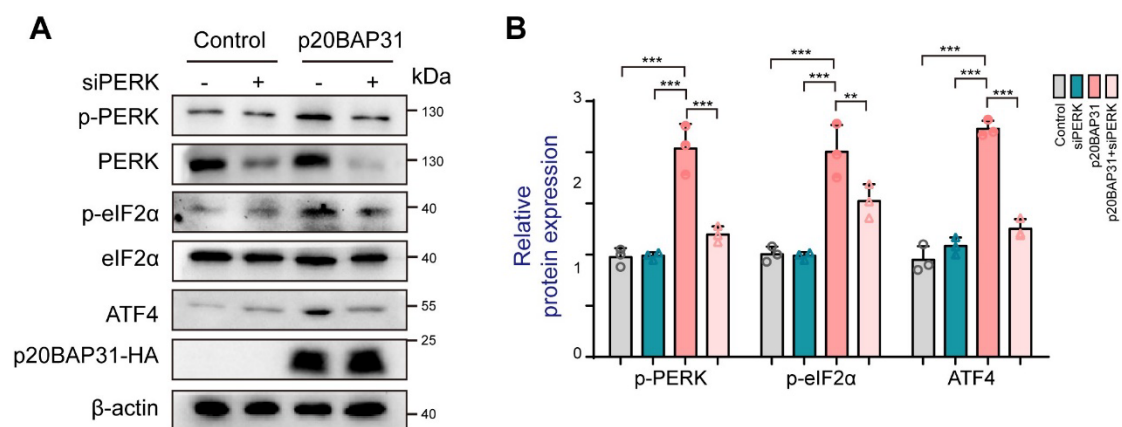

**Figure S3.** siPERK inhibits the activation of PERK signaling pathway induced by p20BAP31. HCT116

cells were transfected with a PERK siRNA and p20BAP31 for 48 h. **(A)** Western blot analysis was used to detect p-PERK, PERK, p-eIF2 $\alpha$ , eIF2 $\alpha$ , ATF4 and p20BAP31-HA levels. **(B)** Quantification analysis of p-PERK, p-eIF2 $\alpha$  and ATF4.  $\beta$ -actin served as the loading control. The data are presented as the means  $\pm$  SDs of three independent experiments. \*\* $P < 0.01$ , \*\*\* $P < 0.001$ .

**Table S1.** Sequences of primers for PCR, qRT-PCR and siRNA.

| Targets                | Primer Sequences (5'-3')                                       | Purpose |
|------------------------|----------------------------------------------------------------|---------|
| Human p20BAP31 Forward | CGGAATTCATGAGTCTGCAGTGGACTGC                                   | PCR     |
| Human p20BAP31 Reverse | CGGGATCCTTAAGCGTAGTCTGGGACGTCGTATGGGT<br>AGTCAACAGCAGCTCCCTTCT | PCR     |
| Human LC3B Forward     | ACACAGCATGGTCAGCGTCT                                           | qRT-PCR |
| Human LC3B Reverse     | TTTCATCCCGAACGTCTCCT                                           | qRT-PCR |
| Human Beclin-1 Forward | AACCTCAGCCGAAGACTGAA                                           | qRT-PCR |
| Human Beclin-1 Reverse | GACGTTGAGCTGAGTGTTCCA                                          | qRT-PCR |
| Human p62 Forward      | AGCGTCTGCGAGGGAAAAG                                            | qRT-PCR |
| Human p62 Reverse      | ACCCGAAGTGTCCTGTTT                                             | qRT-PCR |
| Human ATG5 Forward     | AAGACCTTCTGCACTGTCCA                                           | qRT-PCR |
| Human ATG5 Reverse     | GAGTTTCCGATTGATGGCCC                                           | qRT-PCR |
| Human GAPDH Forward    | TCGTGGAAGGACTCATGACC                                           | qRT-PCR |
| Human GAPDH Reverse    | ATGATGTTCTGGAGAGCCCC                                           | qRT-PCR |
| Human siPERK sense     | GGUUGGAGACUUUGGGUUAUU                                          | siRNA   |
| Human siPERK antisense | UAACCCAAAGUCUCCAACCUU                                          | siRNA   |
